# Supplementary material
Source: Springer Nature journal article supplement (http://www.springermedizin.de/resource/supplementary/12958_2009_501_MOESM1_ESM.pdf/9568156)

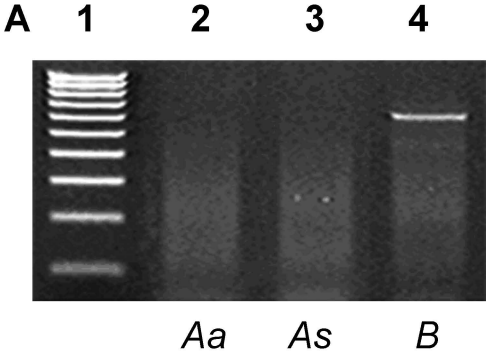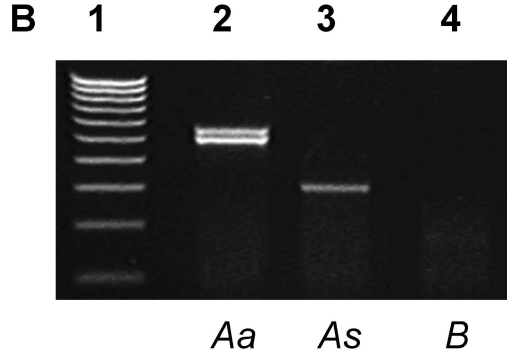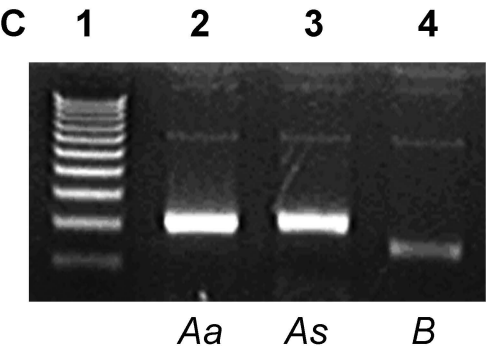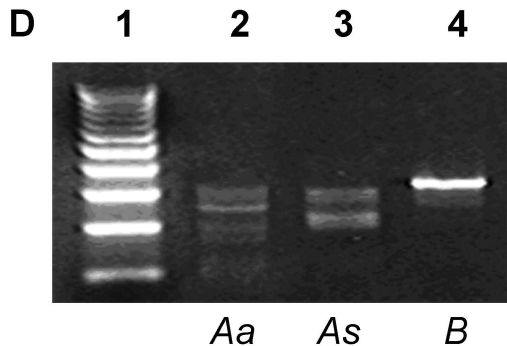

Supplement: MOESM1 [file 9568156]
